# Supplementary material
Source: PubMed Central journal article supplement (PMC6027991)
Supplement: NIHMS78364-supplement-Appendix.pdf [file NIHMS78364-supplement-Appendix.pdf]

## Appendix A: Additional tables

**Table A.1.** Observed transitions and line parameters derived from Gaussian fits. Rest frequencies and spectroscopic data are taken from the MADEX catalogue (Cernicharo 2012).

| Transition                            | Frequency<br>(MHz) | $E_{up}$<br>(K) | $A_{ul}$<br>( $s^{-1}$ ) | $\int T_A^* dv$<br>(mK km s $^{-1}$ ) | $V_{LSR}$<br>(km s $^{-1}$ ) | $\Delta v$<br>(km s $^{-1}$ ) | $T_A^*$<br>(mK) |
|---------------------------------------|--------------------|-----------------|--------------------------|---------------------------------------|------------------------------|-------------------------------|-----------------|
| <b>NCO (<math>^2\Pi_{3/2}</math>)</b> |                    |                 |                          |                                       |                              |                               |                 |
| $J = 7/2 - 5/2$ $F = 9/2 - 7/2$ $e$   | 81404.300          | 6.6             | $9.19 \cdot 10^{-7}$     | 3.6(9)                                | 5.32( 4)                     | 0.42(10)                      | 8.0             |
| $J = 7/2 - 5/2$ $F = 9/2 - 7/2$ $f$   | 81404.813          | 6.6             | $9.19 \cdot 10^{-7}$     | 4.1(9)                                | 5.41( 3)                     | 0.42( 7)                      | 9.0             |
| $J = 7/2 - 5/2$ $F = 7/2 - 5/2$ $e$   | 81413.120          | 6.6             | $8.44 \cdot 10^{-7}$     | 2.1(9)                                | 5.45( 4)                     | 0.34(10)                      | 5.9             |
| $J = 7/2 - 5/2$ $F = 7/2 - 5/2$ $f$   | 81413.573          | 6.6             | $8.44 \cdot 10^{-7}$     | 3.2(9)                                | 5.26( 4)                     | 0.45(10)                      | 6.6             |
| $J = 7/2 - 5/2$ $F = 5/2 - 3/2$ $e$   | 81418.385          | 6.6             | $8.17 \cdot 10^{-7}$     | 2.9(9)                                | 5.24( 6)                     | 0.44(11)                      | 6.2             |
| $J = 7/2 - 5/2$ $F = 5/2 - 3/2$ $f$   | 81418.884          | 6.6             | $8.17 \cdot 10^{-7}$     | 1.6(9)                                | 5.43( 5)                     | 0.27(17)                      | 5.4             |
| $J = 9/2 - 7/2$ $F = 11/2 - 9/2$ $e$  | 104665.278         | 11.7            | $2.19 \cdot 10^{-6}$     | 5.0(9)                                | 5.45( 5)                     | 0.55(10)                      | 8.6             |
| $J = 9/2 - 7/2$ $F = 11/2 - 9/2$ $f$  | 104666.098         | 11.7            | $2.19 \cdot 10^{-6}$     | 5.4(9)                                | 5.43( 4)                     | 0.55( 7)                      | 9.1             |
| $J = 9/2 - 7/2$ $F = 9/2 - 7/2$ $e$   | 104670.139         | 11.7            | $2.08 \cdot 10^{-6}$     | 3.6(9)                                | 5.36( 4)                     | 0.45(11)                      | 7.6             |
| $J = 9/2 - 7/2$ $F = 9/2 - 7/2$ $f$   | 104670.905         | 11.7            | $2.08 \cdot 10^{-6}$     | 3.9(9)                                | 5.35( 3)                     | 0.37( 8)                      | 9.9             |
| $J = 9/2 - 7/2$ $F = 7/2 - 5/2$ $e$   | 104673.371         | 11.7            | $2.05 \cdot 10^{-6}$     | 1.6(9)                                | 5.26( 4)                     | 0.22( 7)                      | 7.1             |
| $J = 9/2 - 7/2$ $F = 7/2 - 5/2$ $f$   | 104674.173         | 11.7            | $2.05 \cdot 10^{-6}$     | 2.9(9)                                | 5.32( 4)                     | 0.35( 8)                      | 7.8             |
| <b>H<sub>2</sub>NCO<sup>+</sup></b>   |                    |                 |                          |                                       |                              |                               |                 |
| $4_{1,4} - 3_{1,3}$                   | 80246.376          | 8.7             | $4.28 \cdot 10^{-5}$     | 2.0(5)                                | 5.02( 1)                     | 0.18(60)                      | 10.4            |
| $4_{0,4} - 3_{0,3}$                   | 80906.926          | 9.7             | $4.67 \cdot 10^{-5}$     | 2.8(5)                                | 5.32( 5)                     | 0.53( 9)                      | 4.9             |
| $4_{1,3} - 3_{1,2}$                   | 81565.636          | 8.8             | $4.49 \cdot 10^{-5}$     | 4.9(9)                                | 5.16( 5)                     | 0.63(10)                      | 7.3             |
| $5_{1,5} - 4_{1,4}$                   | 100306.949         | 13.5            | $8.74 \cdot 10^{-5}$     | 5.0(5)                                | 5.37( 3)                     | 0.53( 5)                      | 8.9             |
| $5_{0,5} - 4_{0,4}$                   | 101131.130         | 14.6            | $9.33 \cdot 10^{-5}$     | 3.8(9)                                | 5.45( 7)                     | 0.70(15)                      | 5.0             |
| $5_{1,4} - 4_{1,3}$                   | 101955.974         | 13.7            | $9.18 \cdot 10^{-5}$     | 4.2(9)                                | 5.20( 4)                     | 0.38( 8)                      | 10.4            |
| <b>HNCOH<sup>+</sup></b>              |                    |                 |                          |                                       |                              |                               |                 |
| $5 - 4$                               | 99559.525          | 14.3            | $8.82 \cdot 10^{-6}$     | <0.8                                  |                              |                               | <3.3            |
| <b>HNCO</b>                           |                    |                 |                          |                                       |                              |                               |                 |
| $4_{0,4} - 3_{0,3}$ $F = 3 - 3$       | 87924.381          | 10.5            | $7.25 \cdot 10^{-7}$     | 19(1)                                 | 5.33(1)                      | 0.33(2)                       | 53.5            |
| $4_{0,4} - 3_{0,3}$ $F = 5 - 4$       | 87925.252          | 10.5            | $9.02 \cdot 10^{-6}$     | 761(2)                                | 5.31(1)                      | 0.44(1)                       | 1619.6          |
| $4_{0,4} - 3_{0,3}$ $F = 4 - 3$       | 87925.252          | 10.5            | $8.46 \cdot 10^{-6}$     |                                       |                              |                               |                 |
| $4_{0,4} - 3_{0,3}$ $F = 3 - 2$       | 87925.252          | 10.5            | $8.29 \cdot 10^{-6}$     |                                       |                              |                               |                 |
| $4_{0,4} - 3_{0,3}$ $F = 4 - 4$       | 87925.898          | 10.5            | $5.64 \cdot 10^{-7}$     | 24(1)                                 | 5.30(1)                      | 0.40(2)                       | 57.4            |
| $5_{0,5} - 4_{0,4}$ $F = 4 - 4$       | 109904.922         | 15.8            | $8.81 \cdot 10^{-7}$     | 12(1)                                 | 5.33(1)                      | 0.34(3)                       | 33.2            |
| $5_{0,5} - 4_{0,4}$ $F = 6 - 5$       | 109905.758         | 15.8            | $1.80 \cdot 10^{-5}$     | 553(1)                                | 5.31(1)                      | 0.36(1)                       | 1450.3          |
| $5_{0,5} - 4_{0,4}$ $F = 5 - 4$       | 109905.758         | 15.8            | $1.73 \cdot 10^{-5}$     |                                       |                              |                               |                 |
| $5_{0,5} - 4_{0,4}$ $F = 4 - 3$       | 109905.758         | 15.8            | $1.71 \cdot 10^{-5}$     |                                       |                              |                               |                 |
| $5_{0,5} - 4_{0,4}$ $F = 5 - 5$       | 109906.430         | 15.8            | $7.21 \cdot 10^{-7}$     | 11(1)                                 | 5.31(2)                      | 0.37(4)                       | 28.2            |
| <b>HOCN</b>                           |                    |                 |                          |                                       |                              |                               |                 |
| $4_{0,4} - 3_{0,3}$                   | 83900.569          | 10.1            | $4.18 \cdot 10^{-5}$     | 50(1)                                 | 5.31(1)                      | 0.47(1)                       | 99.7            |
| $5_{0,5} - 4_{0,4}$                   | 104874.676         | 15.1            | $8.36 \cdot 10^{-5}$     | 34(1)                                 | 5.30(1)                      | 0.38(1)                       | 83.2            |
| <b>HCNO</b>                           |                    |                 |                          |                                       |                              |                               |                 |
| $4 - 3$                               | 91751.320          | 11.0            | $3.84 \cdot 10^{-5}$     | 21(1)                                 | 5.33(1)                      | 0.41(2)                       | 47.4            |
| $5 - 4$                               | 114688.383         | 16.5            | $7.67 \cdot 10^{-5}$     | 8(2)                                  | 5.35(3)                      | 0.26(5)                       | 28.6            |
| <b>HONC</b>                           |                    |                 |                          |                                       |                              |                               |                 |
| $4 - 3$                               | 87625.193          | 10.5            | $3.41 \cdot 10^{-5}$     | <2.1                                  |                              |                               | <8.1            |
| $5 - 4$                               | 109530.044         | 15.8            | $6.81 \cdot 10^{-5}$     | <1.6                                  |                              |                               | <6.9            |

**Table A.2.** Formation enthalpy estimates in kcal mol<sup>-1</sup>

| Species                         | $\Delta H$ | Ref. |
|---------------------------------|------------|------|
| HNCO <sup>+</sup>               | 243        | 1    |
| HOCN <sup>+</sup>               | 274        | 2    |
| HCNO <sup>+</sup>               | 292        | 2    |
| HONC <sup>+</sup>               | 331.7      | 2    |
| HNOC <sup>+</sup>               | 331.4      | 2    |
| H <sub>2</sub> NCO <sup>+</sup> | 167        | 1    |
| HNCOH <sup>+</sup>              | 183        | 3    |
| HCNOH <sup>+</sup>              | 234.8      | 3    |
| H <sub>2</sub> OCN <sup>+</sup> | 240.9      | 3    |
| H <sub>2</sub> CNO <sup>+</sup> | 243        | 3    |

**Notes.** (1) Lias et al. (1984); (2) computed from Luna et al. (1996) using the experimental value for the most stable isomer HNCO<sup>+</sup>; (3) computed from Ijjaali et al. (2001) using the experimental value for the most stable isomer H<sub>2</sub>NCO<sup>+</sup>.

**Table A.3.** Assumed rate coefficients of the DR reaction of the CH<sub>2</sub>NO<sup>+</sup> ions.

| Reaction                                                    | Rate Coefficient<br>( $\times 10^{-7}(T/300)^{-0.5} \text{ cm}^3 \text{ s}^{-1}$ ) |
|-------------------------------------------------------------|------------------------------------------------------------------------------------|
| H <sub>2</sub> NCO <sup>+</sup> + e → HNCO + H              | 2.50                                                                               |
| H <sub>2</sub> NCO <sup>+</sup> + e → CO + NH <sub>2</sub>  | 0.50                                                                               |
| H <sub>2</sub> NCO <sup>+</sup> + e → NCO + H <sub>2</sub>  | 1.50                                                                               |
| H <sub>2</sub> CNO <sup>+</sup> + e → HCNO + H              | 2.50                                                                               |
| H <sub>2</sub> CNO <sup>+</sup> + e → CH <sub>2</sub> + NO  | 0.50                                                                               |
| HCNOH <sup>+</sup> + e → HCNO + H                           | 2.50                                                                               |
| HCNOH <sup>+</sup> + e → HONC + H                           | 0.50                                                                               |
| HCNOH <sup>+</sup> + e → HCN + OH                           | 0.50                                                                               |
| HNCOH <sup>+</sup> + e → HOCN + H                           | 0.50                                                                               |
| HNCOH <sup>+</sup> + e → HNCO + H                           | 2.50                                                                               |
| HNCOH <sup>+</sup> + e → HNC + OH                           | 0.50                                                                               |
| H <sub>2</sub> OCN <sup>+</sup> + e → HOCN + H              | 1.50                                                                               |
| H <sub>2</sub> OCN <sup>+</sup> + e → H <sub>2</sub> O + CN | 0.50                                                                               |
